# Supplementary material for: Vitamin D as a Biomarker of Ill-Health among the Over-50s: A Systematic Review of Cohort Studies
Source: MDPI journal article supplement (doi:10.3390/nu11102384), 2019-10-06
Supplement: s1 [file s1]

Table S3: Characteristics of studies included

|                                                |                                                                                                                                                              |
|------------------------------------------------|--------------------------------------------------------------------------------------------------------------------------------------------------------------|
| <b>Author</b>                                  | <b>Afzal 2014</b>                                                                                                                                            |
| <b>Design</b>                                  | cohort                                                                                                                                                       |
| <b>Cohort name</b>                             | Copenhagen City Heart Study & Copenhagen General Population Study                                                                                            |
| <b>Number of cohorts</b>                       | 2                                                                                                                                                            |
| <b>Country</b>                                 | Denmark                                                                                                                                                      |
| <b>Enrollment year</b>                         | <i>Copenhagen City Heart Study 1976-1978</i><br><i>Copenhagen General Population Study 2003</i>                                                              |
| <b>Baseline year</b>                           | <i>Copenhagen City Heart Study 1981-1983</i><br><i>Copenhagen General Population Study 2004-2005</i>                                                         |
| <b>No. Enrolled</b>                            | <i>Copenhagen City Heart Study</i>                                                                                                                           |
| <b>Total participants included (% females)</b> | No. of enrolled 10116<br>Total included 10116 (F 56,2%)<br><i>Copenhagen General Population Study</i><br>No. of enrolled 8391<br>Total included 8391 (F 53%) |
| <b>Mean age (range / SD)</b>                   | <i>Copenhagen City Heart Study</i><br>Age 58 (47 - 64)<br><i>Copenhagen General Population Study</i><br>Age 56 (46 - 66)                                     |
| <b>Follow-up (years)</b>                       | <i>Copenhagen City Heart Study</i><br>20 years from baseline<br><i>Copenhagen General Population Study</i><br>5 years from baseline                          |
|                                                |                                                                                                                                                              |
| <b>Author</b>                                  | <b>Afzal 2013</b>                                                                                                                                            |
| <b>Design</b>                                  | cohort                                                                                                                                                       |
| <b>Cohort name</b>                             | Copenhagen City Heart Study                                                                                                                                  |
| <b>Number of cohorts</b>                       | 1                                                                                                                                                            |

|                                                |                                                                     |
|------------------------------------------------|---------------------------------------------------------------------|
| <b>Country</b>                                 | Denmark                                                             |
| <b>Enrollment year</b>                         | 1981–1983                                                           |
| <b>Baseline year</b>                           | 1981–1983                                                           |
| <b>No. Enrolled</b>                            | No. of enrolled 10060                                               |
| <b>Total participants included (% females)</b> | Total included 10060 (F 56,2%)                                      |
| <b>Mean age (range / SD)</b>                   | Age 58 (48 - 65)                                                    |
| <b>Follow-up (years)</b>                       | 20 years from baseline                                              |
|                                                |                                                                     |
| <b>Author</b>                                  | <b>Al-khalidi 2019</b>                                              |
| <b>Design</b>                                  | cohort                                                              |
| <b>Cohort name</b>                             | Third National Health and Nutrition Examination Survey (NHANES III) |
| <b>Number of cohorts</b>                       | 1                                                                   |
| <b>Country</b>                                 | USA                                                                 |
| <b>Enrollment year</b>                         | 1988-1994                                                           |
| <b>Baseline year</b>                           | 1988–1994                                                           |
| <b>No. Enrolled</b>                            | No. of enrolled 33994                                               |
| <b>Total participants included (% females)</b> | Total included 6896 (F n.a.)                                        |
| <b>Mean age (range / SD)</b>                   | Age 61.1 (13.9)                                                     |
| <b>Follow-up (years)</b>                       | 17.9 years from baseline                                            |
|                                                |                                                                     |
| <b>Author</b>                                  | <b>Arabi 2012</b>                                                   |
| <b>Design</b>                                  | cohort                                                              |
| <b>Cohort name</b>                             | Lebanese cohort                                                     |
| <b>Number of cohorts</b>                       | 1                                                                   |
| <b>Country</b>                                 | Lebanon                                                             |
| <b>Enrollment year</b>                         | 2002-2003                                                           |
| <b>Baseline year</b>                           | 2002-2003                                                           |
| <b>No. Enrolled</b>                            | No. of enrolled 195                                                 |
| <b>Total participants included (% females)</b> | Total included 192 (F 66,7%)                                        |
| <b>Mean age (range / SD)</b>                   | Age 72.3 (5.1)                                                      |

|                                                |                                                                                                                                            |
|------------------------------------------------|--------------------------------------------------------------------------------------------------------------------------------------------|
| <b>Follow-up (years)</b>                       | 4 years from baseline                                                                                                                      |
| <b>Author</b>                                  | <b>Aregbesola 2013</b>                                                                                                                     |
| <b>Design</b>                                  | cohort                                                                                                                                     |
| <b>Cohort name</b>                             | Kuopio Ischaemic Heart Disease Risk Factor Study (KIHD)                                                                                    |
| <b>Number of cohorts</b>                       | 2                                                                                                                                          |
| <b>Country</b>                                 | Finland                                                                                                                                    |
| <b>Enrollment year</b>                         | 1516 men aged 42, 48, 54 or 60 years enrolled in 1986–1989 + random sample of 920 postmenopausal women aged 53–73 years from the same area |
| <b>Baseline year</b>                           | 1998-2001                                                                                                                                  |
| <b>No. Enrolled</b>                            | No. of enrolled 2436                                                                                                                       |
| <b>Total participants included (% females)</b> | Total included 1421 (F 49,1%)                                                                                                              |
| <b>Mean age (range / SD)</b>                   | Age 62.5 (53-73)                                                                                                                           |
| <b>Follow-up (years)</b>                       | 9.8 years from baseline                                                                                                                    |
| <b>Author</b>                                  | <b>Barrett-Connor 2012</b>                                                                                                                 |
| <b>Design</b>                                  | cohort                                                                                                                                     |
| <b>Cohort name</b>                             | Osteoporotic Fractures in Men Study (MrOS)                                                                                                 |
| <b>Number of cohorts</b>                       | 1                                                                                                                                          |
| <b>Country</b>                                 | USA                                                                                                                                        |
| <b>Enrollment year</b>                         | 2000-2002                                                                                                                                  |
| <b>Baseline year</b>                           | 2000-2002                                                                                                                                  |
| <b>No. Enrolled</b>                            | No. of enrolled 5994                                                                                                                       |
| <b>Total participants included (% females)</b> | Total included 1468 (F 0%)                                                                                                                 |
| <b>Mean age (range / SD)</b>                   | Age 74 (5.7)                                                                                                                               |
| <b>Follow-up (years)</b>                       | 4.7 years from baseline                                                                                                                    |
| <b>Author</b>                                  | <b>Brøndum-Jacobsen 2012</b>                                                                                                               |
| <b>Design</b>                                  | cohort                                                                                                                                     |

|                                                |                                                                                                                                                                                                                                 |
|------------------------------------------------|---------------------------------------------------------------------------------------------------------------------------------------------------------------------------------------------------------------------------------|
| <b>Cohort name</b>                             | Copenhagen City Heart Study                                                                                                                                                                                                     |
| <b>Number of cohorts</b>                       | 1                                                                                                                                                                                                                               |
| <b>Country</b>                                 | Denmark                                                                                                                                                                                                                         |
| <b>Enrollment year</b>                         | 1976-1978                                                                                                                                                                                                                       |
| <b>Baseline year</b>                           | 1981–1983                                                                                                                                                                                                                       |
| <b>No. Enrolled</b>                            | No. of enrolled 12698                                                                                                                                                                                                           |
| <b>Total participants included (% females)</b> | Total included 10170 (F 56%)                                                                                                                                                                                                    |
| <b>Mean age (range / SD)</b>                   | Age 57 (49-66)                                                                                                                                                                                                                  |
| <b>Follow-up (years)</b>                       | 21 years from baseline                                                                                                                                                                                                          |
|                                                |                                                                                                                                                                                                                                 |
| <b>Author</b>                                  | <b>Cauley 2010</b>                                                                                                                                                                                                              |
| <b>Design</b>                                  | case-cohort                                                                                                                                                                                                                     |
| <b>Cohort name</b>                             | Osteoporotic Fractures in Men Study (MrOS)                                                                                                                                                                                      |
| <b>Number of cohorts</b>                       | 1                                                                                                                                                                                                                               |
| <b>Country</b>                                 | USA                                                                                                                                                                                                                             |
| <b>Enrollment year</b>                         | 2000-2002                                                                                                                                                                                                                       |
| <b>Baseline year</b>                           | 2000-2002                                                                                                                                                                                                                       |
| <b>No. Enrolled</b>                            | No. of enrolled 5995                                                                                                                                                                                                            |
| <b>Total participants included (% females)</b> | Total included 1606 (F 0%)<br>Total sample for the non-spine fracture analysis (1929 men, 1494 subcohort and 435 fracture cases)<br>Total sample for hip fracture analysis (1665 men, 1584 subcohort and 81 hip fracture cases) |
| <b>Mean age (range / SD)</b>                   | Age 73.8 (5.9)                                                                                                                                                                                                                  |
| <b>Follow-up (years)</b>                       | 5.3 years from baseline                                                                                                                                                                                                         |
|                                                |                                                                                                                                                                                                                                 |
| <b>Author</b>                                  | <b>Heath 2017</b>                                                                                                                                                                                                               |
| <b>Design</b>                                  | case-cohort                                                                                                                                                                                                                     |
| <b>Cohort name</b>                             | Melbourne Collaborative Cohort Study (MCCS)                                                                                                                                                                                     |
| <b>Number of cohorts</b>                       | 1                                                                                                                                                                                                                               |
| <b>Country</b>                                 | Australia                                                                                                                                                                                                                       |
| <b>Enrollment year</b>                         | 1990-1994                                                                                                                                                                                                                       |

|                                                |                                                                            |
|------------------------------------------------|----------------------------------------------------------------------------|
| <b>Baseline year</b>                           | 1990-1994                                                                  |
| <b>No. Enrolled</b>                            | No. of enrolled 41514                                                      |
| <b>Total participants included (% females)</b> | Total included 4964 (F 46,5%)<br>Cases 2410<br>Sub-cohort of controls 2996 |
| <b>Mean age (range / SD)</b>                   | Age 54.5 (40-69)                                                           |
| <b>Follow-up (years)</b>                       | 13.7 years from baseline                                                   |
|                                                |                                                                            |
| <b>Author</b>                                  | <b>Hirani 2018</b>                                                         |
| <b>Design</b>                                  | cohort                                                                     |
| <b>Cohort name</b>                             | Concord Health and Aging in Men Project (CHAMP)                            |
| <b>Number of cohorts</b>                       | 1                                                                          |
| <b>Country</b>                                 | Australia                                                                  |
| <b>Enrollment year</b>                         | 2005-2007                                                                  |
| <b>Baseline year</b>                           | 2005-2007                                                                  |
| <b>No. Enrolled</b>                            | No. of enrolled 1705                                                       |
| <b>Total participants included (% females)</b> | Total included 1705 (F 0%)                                                 |
| <b>Mean age (range / SD)</b>                   | Age 77.8 (4.6)                                                             |
| <b>Follow-up (years)</b>                       | 5 years from baseline                                                      |
|                                                |                                                                            |
| <b>Author</b>                                  | <b>Holmberg 2017</b>                                                       |
| <b>Design</b>                                  | nested case-control                                                        |
| <b>Cohort name</b>                             | Swedish farmers study                                                      |
| <b>Number of cohorts</b>                       | 1                                                                          |
| <b>Country</b>                                 | Sweden                                                                     |
| <b>Enrollment year</b>                         | 1989                                                                       |
| <b>Baseline year</b>                           | 1990-1991                                                                  |
| <b>No. Enrolled</b>                            | No. of enrolled 2350                                                       |
| <b>Total participants included (% females)</b> | Total included 529 (F 0%)<br>Cases 276                                     |

|                                                |                                |
|------------------------------------------------|--------------------------------|
|                                                | Controls 276                   |
| <b>Mean age (range / SD)</b>                   | Age 51.5 (n.a.)                |
| <b>Follow-up (years)</b>                       | 20 years from baseline         |
|                                                |                                |
| <b>Author</b>                                  | <b>Jassal 2010</b>             |
| <b>Design</b>                                  | cohort                         |
| <b>Cohort name</b>                             | The Rancho Bernardo Study      |
| <b>Number of cohorts</b>                       | 1                              |
| <b>Country</b>                                 | USA                            |
| <b>Enrollment year</b>                         | 1972                           |
| <b>Baseline year</b>                           | 1997-1999                      |
| <b>No. Enrolled</b>                            | No. of enrolled 2062           |
| <b>Total participants included (% females)</b> | Total included 1073 (F 61,7%)  |
| <b>Mean age (range / SD)</b>                   | Age 74 (10)                    |
| <b>Follow-up (years)</b>                       | 6.8 years from baseline        |
|                                                |                                |
| <b>Author</b>                                  | <b>Khaw 2014</b>               |
| <b>Design</b>                                  | cohort                         |
| <b>Cohort name</b>                             | EPIC cohort                    |
| <b>Number of cohorts</b>                       | 1                              |
| <b>Country</b>                                 | UK                             |
| <b>Enrollment year</b>                         | 1993-1997                      |
| <b>Baseline year</b>                           | 1997-2000                      |
| <b>No. Enrolled</b>                            | No. of enrolled 25639          |
| <b>Total participants included (% females)</b> | Total included 14641 (F 55,7%) |
| <b>Mean age (range / SD)</b>                   | Age 62.9 (9)                   |
| <b>Follow-up (years)</b>                       | 13 years from baseline         |
|                                                |                                |
| <b>Author</b>                                  | <b>Licher 2017</b>             |

|                                                |                                                                                                                                                            |
|------------------------------------------------|------------------------------------------------------------------------------------------------------------------------------------------------------------|
| <b>Design</b>                                  | cohort                                                                                                                                                     |
| <b>Cohort name</b>                             | The Rotterdam Study (RS-I-3) & The Rotterdam Study (RS-II-1)                                                                                               |
| <b>Number of cohorts</b>                       | 2                                                                                                                                                          |
| <b>Country</b>                                 | Netherland                                                                                                                                                 |
| <b>Enrollment year</b>                         | <i>The Rotterdam Study (RS-I-3)</i> 1990<br><i>The Rotterdam Study (RS-II-1)</i> 2000                                                                      |
| <b>Baseline year</b>                           | <i>The Rotterdam Study (RS-I-3)</i> 1997-1999<br><i>The Rotterdam Study (RS-II-1)</i> 2000-2001                                                            |
| <b>No. Enrolled</b>                            | <i>The Rotterdam Study (RS-I-3)</i>                                                                                                                        |
| <b>Total participants included (% females)</b> | No. of enrolled 7983<br>Total included 3043,5 (F 56,9%)<br><i>The Rotterdam Study (RS-II-1)</i><br>No. of enrolled 3011<br>Total included 3043,5 (F 56,9%) |
| <b>Mean age (range / SD)</b>                   | Age 69.2 (8.2)                                                                                                                                             |
| <b>Follow-up (years)</b>                       | 15 years from baseline                                                                                                                                     |
|                                                |                                                                                                                                                            |
| <b>Author</b>                                  | <b>Liu 2012</b>                                                                                                                                            |
| <b>Design</b>                                  | cohort                                                                                                                                                     |
| <b>Cohort name</b>                             | Third National Health and Nutrition Examination Survey (NHANES III)                                                                                        |
| <b>Number of cohorts</b>                       | 1                                                                                                                                                          |
| <b>Country</b>                                 | USA                                                                                                                                                        |
| <b>Enrollment year</b>                         | 1988-1994                                                                                                                                                  |
| <b>Baseline year</b>                           | 1988-1994                                                                                                                                                  |
| <b>No. Enrolled</b>                            | No. of enrolled n.a                                                                                                                                        |
| <b>Total participants included (% females)</b> | Total included 13131 (F 53,3%)                                                                                                                             |
| <b>Mean age (range / SD)</b>                   | Age 55 (n.a.)                                                                                                                                              |
| <b>Follow-up (years)</b>                       | 8 years from baseline                                                                                                                                      |
|                                                |                                                                                                                                                            |
| <b>Author</b>                                  | <b>Looker 2013</b>                                                                                                                                         |

|                                                |                                                                                                                                            |
|------------------------------------------------|--------------------------------------------------------------------------------------------------------------------------------------------|
| <b>Design</b>                                  | cohort                                                                                                                                     |
| <b>Cohort name</b>                             | NHANES III & NHANES 2000-2004                                                                                                              |
| <b>Number of cohorts</b>                       | 2                                                                                                                                          |
| <b>Country</b>                                 | USA                                                                                                                                        |
| <b>Enrollment year</b>                         | <i>NHANES III</i> 1988- 1994<br><i>NHANES 2000-2004</i> 2000-2004                                                                          |
| <b>Baseline year</b>                           | <i>NHANES 2000-2004</i> 2000-2004                                                                                                          |
| <b>No. Enrolled</b>                            | <i>NHANES III</i>                                                                                                                          |
| <b>Total participants included (% females)</b> | No. of enrolled 8303<br>Total included 2946 (F 78,6%)<br><i>NHANES 2000-2004</i><br>No. of enrolled 4189<br>Total included 1803 (F 128,5%) |
| <b>Mean age (range / SD)</b>                   | Age 74 (n.a.)                                                                                                                              |
| <b>Follow-up (years)</b>                       | 7 years from baseline                                                                                                                      |
|                                                |                                                                                                                                            |
| <b>Author</b>                                  | <b>Marques-Vidal 2015</b>                                                                                                                  |
| <b>Design</b>                                  | cohort                                                                                                                                     |
| <b>Cohort name</b>                             | Cohorte Lausannoise (CoLaus) study                                                                                                         |
| <b>Number of cohorts</b>                       | 1                                                                                                                                          |
| <b>Country</b>                                 | Switzerland                                                                                                                                |
| <b>Enrollment year</b>                         | 2003-2006                                                                                                                                  |
| <b>Baseline year</b>                           | 2003-2006                                                                                                                                  |
| <b>No. Enrolled</b>                            | No. of enrolled 6733                                                                                                                       |
| <b>Total participants included (% females)</b> | Total included 3841 (F 57,6%)                                                                                                              |
| <b>Mean age (range / SD)</b>                   | Age 52.2 (10.5)                                                                                                                            |
| <b>Follow-up (years)</b>                       | 5.5 years from baseline                                                                                                                    |
|                                                |                                                                                                                                            |
| <b>Author</b>                                  | <b>Mursu 2015</b>                                                                                                                          |
| <b>Design</b>                                  | cohort                                                                                                                                     |



|                                                |                                                         |
|------------------------------------------------|---------------------------------------------------------|
| <b>Cohort name</b>                             | Kuopio Ischaemic Heart Disease Risk Factor Study (KIHD) |
| <b>Number of cohorts</b>                       | 1                                                       |
| <b>Country</b>                                 | Finland                                                 |
| <b>Enrollment year</b>                         | 1984-1989                                               |
| <b>Baseline year</b>                           | 1984-1989                                               |
| <b>No. Enrolled</b>                            | No. of enrolled 2682                                    |
| <b>Total participants included (% females)</b> | Total included 1892 (F 0%)                              |
| <b>Mean age (range / SD)</b>                   | Age (42- 60)                                            |
| <b>Follow-up (years)</b>                       | 26 years from baseline                                  |

|                                                |                                         |
|------------------------------------------------|-----------------------------------------|
| <b>Author</b>                                  | <b>Olsson 2017</b>                      |
| <b>Design</b>                                  | cohort                                  |
| <b>Cohort name</b>                             | Uppsala Longitudinal Study of Adult men |
| <b>Number of cohorts</b>                       | 1                                       |
| <b>Country</b>                                 | Sweden                                  |
| <b>Enrollment year</b>                         | 1970                                    |
| <b>Baseline year</b>                           | 1991-1995                               |
| <b>No. Enrolled</b>                            | No. of enrolled 2322                    |
| <b>Total participants included (% females)</b> | Total included 1182 (F 0%)              |
| <b>Mean age (range / SD)</b>                   | Age 71 (69- 74)                         |
| <b>Follow-up (years)</b>                       | 18 years from baseline                  |

|                          |                                      |
|--------------------------|--------------------------------------|
| <b>Author</b>            | <b>Platz 2004</b>                    |
| <b>Design</b>            | nested case-control                  |
| <b>Cohort name</b>       | Health Professionals Follow-up Study |
| <b>Number of cohorts</b> | 1                                    |
| <b>Country</b>           | USA                                  |
| <b>Enrollment year</b>   | 1986                                 |
| <b>Baseline year</b>     | 1993-1995                            |
| <b>No. Enrolled</b>      | No. of enrolled 51529                |

|                                                |                                                        |
|------------------------------------------------|--------------------------------------------------------|
| <b>Total participants included (% females)</b> | Total included 920 (F 0%)<br>Cases 460<br>Controls 460 |
| <b>Mean age (range / SD)</b>                   | Age 66.5 (7.4)                                         |
| <b>Follow-up (years)</b>                       | 5 years from baseline                                  |
|                                                |                                                        |
| <b>Author</b>                                  | <b>Shimizu 2015</b>                                    |
| <b>Design</b>                                  | cohort                                                 |
| <b>Cohort name</b>                             | Otasha-Kenshin study                                   |
| <b>Number of cohorts</b>                       | 1                                                      |
| <b>Country</b>                                 | Japan                                                  |
| <b>Enrollment year</b>                         | 2008                                                   |
| <b>Baseline year</b>                           | 2008                                                   |
| <b>No. Enrolled</b>                            | No. of enrolled 1399                                   |
| <b>Total participants included (% females)</b> | Total included 1393 (F 100%)                           |
| <b>Mean age (range / SD)</b>                   | Age 78.6 (75-90)                                       |
| <b>Follow-up (years)</b>                       | 1 years from baseline                                  |
|                                                |                                                        |
| <b>Author</b>                                  | <b>Swanson 2015</b>                                    |
| <b>Design</b>                                  | cohort                                                 |
| <b>Cohort name</b>                             | Osteoporotic Fractures in Men Study (MrOS)             |
| <b>Number of cohorts</b>                       | 1                                                      |
| <b>Country</b>                                 | USA                                                    |
| <b>Enrollment year</b>                         | 2000-2002                                              |
| <b>Baseline year</b>                           | 2000-2002                                              |
| <b>No. Enrolled</b>                            | No. of enrolled 5994                                   |
| <b>Total participants included (% females)</b> | Total included 1000 (F 0%)                             |
| <b>Mean age (range / SD)</b>                   | Age 74.6 (6.2)                                         |
| <b>Follow-up (years)</b>                       | 5.1 years from baseline                                |

|                                                |                                                                             |
|------------------------------------------------|-----------------------------------------------------------------------------|
| <b>Author</b>                                  | <b>Umehara 2017</b>                                                         |
| <b>Design</b>                                  | cohort                                                                      |
| <b>Cohort name</b>                             | Hisayama study                                                              |
| <b>Number of cohorts</b>                       | 1                                                                           |
| <b>Country</b>                                 | Japan                                                                       |
| <b>Enrollment year</b>                         | 1961                                                                        |
| <b>Baseline year</b>                           | 2002-2003                                                                   |
| <b>No. Enrolled</b>                            | No. of enrolled 3328                                                        |
| <b>Total participants included (% females)</b> | Total included 3292 (F 57,2%)                                               |
| <b>Mean age (range / SD)</b>                   | Age 62 (12.5)                                                               |
| <b>Follow-up (years)</b>                       | 9.5 years from baseline                                                     |
|                                                |                                                                             |
| <b>Author</b>                                  | <b>Vàzquez-Oliva 2018</b>                                                   |
| <b>Design</b>                                  | case-cohort                                                                 |
| <b>Cohort name</b>                             | REGICOR (Registre Gironí del COR) population cohort study                   |
| <b>Number of cohorts</b>                       | 1                                                                           |
| <b>Country</b>                                 | Spain                                                                       |
| <b>Enrollment year</b>                         | 2005                                                                        |
| <b>Baseline year</b>                           | 2005                                                                        |
| <b>No. Enrolled</b>                            | No. of enrolled 6352                                                        |
| <b>Total participants included (% females)</b> | Total included 775 (F 50,2%)<br>Cases 105<br>Random sub-cohort controls 667 |
| <b>Mean age (range / SD)</b>                   | Age 53.7 (10.6)                                                             |
| <b>Follow-up (years)</b>                       | 5 years from baseline                                                       |
