# Supplementary material for: Vitamin D as a Biomarker of Ill-Health among the Over-50s: A Systematic Review of Cohort Studies
Source: MDPI journal article supplement (doi:10.3390/nu11102384), 2019-10-06
Supplement: s1 [file s1]

## Table S2: Studies included

### Cohorts and references of studies included in this Systematic Review

#### *Cohorte Lausannoise (CoLaus) study*

##### **Marques-Vidal 2015**

Marques-Vidal P, Vollenweider P, Guessous I, et al. Serum Vitamin D Concentrations Are Not Associated with Insulin Resistance in Swiss Adults. *J Nutr.* 2015;145(9):2117-2122

#### *Concord Health and Aging in Men Project (CHAMP)*

##### **Hirani 2018**

Hirani V, Cumming RG, Naganathan V, et al. Longitudinal Associations Between Vitamin D Metabolites and Sarcopenia in Older Australian men: The Concord Health and Aging in Men Project. *JOURNALS Gerontol Ser A-BIOLOGICAL Sci Med Sci.* 2018;73(1, SI):131-138

#### *Copenhagen City Heart Study*

##### **Afzal 2014**

Afzal S, Lange P, Bojesen SE, Freiberg JJ, Nordestgaard BG. Plasma 25-hydroxyvitamin D, lung function and risk of chronic obstructive pulmonary disease. *Thorax.* 2014;69(1):24-31

##### **Afzal 2013**

Afzal S, Nordestgaard BG, Bojesen SE. Plasma 25-hydroxyvitamin D and risk of non-melanoma and melanoma skin cancer: a prospective cohort study. *J Invest Dermatol.* 2013;133(3):629-636

##### **Brøndum-Jacobsen 2012**

Brøndum-Jacobsen P, Benn M, Jensen GB, Nordestgaard BG. 25-Hydroxyvitamin D Levels and Risk of Ischemic Heart Disease, Myocardial Infarction, and Early Death. *Arterioscler Thromb Vasc Biol.* 2012;32(11):2794-2802

#### *Copenhagen General Population Study*

##### **Afzal 2014**

Afzal S, Lange P, Bojesen SE, Freiberg JJ, Nordestgaard BG. Plasma 25-hydroxyvitamin D, lung function and risk of chronic obstructive pulmonary disease. *Thorax.* 2014;69(1):24-31

#### *EPIC cohort*

##### **Khaw 2014**

Khaw K-T, Lubetz R, Wareham N. Serum 25-hydroxyvitamin D, mortality, and incident cardiovascular disease, respiratory disease, cancers, and fractures: a 13-y prospective population study. *Am J Clin Nutr.* 2014;100(5):1361-1370

#### *Health Professionals Follow-up Study*

##### **Platz 2004**

Platz EA, Leitzmann MF, Hollis BW, Willett WC, Giovannucci E. Plasma 1,25-dihydroxy- and 25-hydroxyvitamin D and subsequent risk of prostate cancer. *Cancer Causes Control*. 2004;15(3):255-265

*Hisayama study*

### **Umehara 2017**

Umehara K, Mukai N, Hata J, et al. Association Between Serum Vitamin D and All-Cause and Cause-Specific Death in a General Japanese Population - The Hisayama Study -. *Circ J*. 2017;81(9):1315+

*Kuopio Ischaemic Heart Disease Risk Factor Study (KIHD)*

### **Aregbesola 2013**

Aregbesola A, Voutilainen S, Nurmi T, Virtanen JK, Ronkainen K, Tuomainen T. Serum 25-hydroxyvitamin D 3 and the risk of pneumonia in an ageing general population. *J Epidemiol Community Health*. 2013;67(6):533-536

### **Mursu 2015**

Mursu J, Nurmi T, Voutilainen S, Tuomainen T-P, Virtanen JK. The association between serum 25-hydroxyvitamin D3 concentration and risk of disease death in men: modification by magnesium intake. *Eur J Epidemiol*. 2015;30(4):343-347

*Lebanese cohort*

### **Arabi 2012**

Arabi A, Baddoura R, El-Rassi R, El-Hajj Fuleihan G. PTH level but not 25 (OH) vitamin D level predicts bone loss rates in the elderly. *Osteoporos Int*. 2012;23(3):971-980

*Melbourne Collaborative Cohort Study (MCCS)*

### **Heath 2017**

Heath AK, Williamson EJ, Kvaskoff D, et al. 25-Hydroxyvitamin D concentration and all-cause mortality: the Melbourne Collaborative Cohort Study. *Public Health Nutr*. 2017;20(10):1775-1784

*Osteoporotic Fractures in Men Study (MrOS)*

### **Barrett-Connor 2012**

Barrett-Connor E, Laughlin GA, Li H, et al. The association of concurrent vitamin D and sex hormone deficiency with bone loss and fracture risk in older men: The osteoporotic fractures in men (MrOS) study. *J Bone Miner Res*. 2012;27(11):2306-2313

### **Cauley 2010**

Cauley JA, Parimi N, Ensrud KE, et al. Serum 25-hydroxyvitamin D and the risk of hip and nonspine fractures in older men. *J Bone Miner Res*. 2010;25(3):545-553

### **Swanson 2015**

Swanson CM, Srikanth P, Lee CG, et al. Associations of 25-Hydroxyvitamin D and 1,25-Dihydroxyvitamin D With Bone Mineral Density, Bone Mineral Density Change, and Incident Nonvertebral Fracture. *J Bone Miner Res*. 2015;30(8):1403-1413

*Otasha-Kenshin study*

### **Shimizu 2015**

Shimizu Y, Kim H, Yoshida H, Shimada H, Suzuki T. Serum 25-hydroxyvitamin D level and risk of falls in Japanese community-dwelling elderly women: a 1-year follow-up study. *Osteoporos Int.* 2015;26(8):2185-2192

*REGICOR (Registre Gironi' del COR) population cohort study*

### **Vázquez-Oliva 2018**

Vázquez-Oliva G, Zamora A, Ramos R, et al. Analysis of Plasma Albumin, Vitamin D, and Apolipoproteins A and B as Predictive Coronary Risk Biomarkers in the REGICOR Study. *Rev Española Cardiol (English Ed.)* 2018;71(11):910-916

*Swedish farmers study*

### **Holmberg 2017**

Holmberg S, Rignell-Hydbom A, Lindh CH, Jonsson BAG, Thelin A, Rylander L. High levels of vitamin D associated with less ischemic heart disease - a nested case-control study among rural men in Sweden. *Ann Agric Environ Med.* 2017;24(2):288-293

*The Rancho Bernardo Study*

### **Jassal 2010**

Jassal SK, Chonchol M, von Mühlen D, Smits G, Barrett-Connor E. Vitamin D, Parathyroid Hormone, and Cardiovascular Mortality in Older Adults: The Rancho Bernardo Study. *Am J Med.* 2010;123(12):1114-1120

*The Rotterdam Study (RS-I-3) & The Rotterdam Study (RS-II-1)*

### **Licher 2017**

Licher S, de Bruijn RFAG, Wolters FJ, Zillikens MC, Ikram MA, Ikram MK. Vitamin D and the Risk of Dementia: The Rotterdam Study. *J Alzheimers Dis.* 2017;60(3):989-997

*Third National Health and Nutrition Examination Survey (NHANES III)*

### **Al-khalidi 2019**

Al-khalidi B, Kuk JL, Arden CI. Journal of Steroid Biochemistry and Molecular Biology Lifetime risk of cardiometabolic mortality according to vitamin D status of middle and older-aged adults : NHANES III mortality follow-up. *J Steroid Biochem Mol Biol.* 2019;186(August 2018):34-41

### **Liu 2012**

Liu L, Chen M, Hankins SR, et al. Serum 25-hydroxyvitamin D concentration and mortality from heart failure and cardiovascular disease, and premature mortality from all-cause in United States adults. *Am J Cardiol.* 2012;110(6):834-839

*Third National Health and Nutrition Examination Survey (NHANES III) & NHANES 2000-2004*

### **Looker 2013**

Looker AC. Serum 25-hydroxyvitamin D and risk of major osteoporotic fractures in older U.S. adults. *J Bone Miner Res.* 2013;28(5):997-1006

*Uppsala Longitudinal Study of Adult men*

**Olsson 2017**

Olsson E, Byberg L, Karlström B, et al. Vitamin D is not associated with incident dementia or cognitive impairment: an 18-y follow-up study in community-living old men. *Am J Clin Nutr.* 2017;105(4):936-943
