# Supplementary material for: Vitamin D as a Biomarker of Ill-Health among the Over-50s: A Systematic Review of Cohort Studies
Source: Nutrients. 2019 Oct 6;11(10):2384. doi: 10.3390/nu11102384 (PMC6836048; doi:10.3390/nu11102384)
Supplement: Supplementary file 1 [file nutrients-11-02384-s001.zip]

Archive with 4 entries (4 files):
- Table S4 Table of results.pdf
- Table S1 Search strategy.pdf
- Table S2 Studies included.pdf
- Table S3 Characteristics of studies included.pdf
